# Supplementary material for: Impact of intensified tuberculosis case finding at health facilities on case notifications in Cameroon: A controlled interrupted time series analysis
Source: PubMed Central journal article supplement (PMC10021155; doi:10.1371/journal.pgph.0000301), 2022-07-19
Supplement: pgph.0000301.s001.pdf [file pgph.0000301.s001.pdf]

**STROBE Statement—checklist of items that should be included in reports of observational studies**

Format from R. Jandoc et al., *Journal of Clinical Epidemiology* 68 (2015), 950-956

| Item                         | Item | Recommendation                                                                                                   | Location                                                                                       |
|------------------------------|------|------------------------------------------------------------------------------------------------------------------|------------------------------------------------------------------------------------------------|
| Title and abstract           | 1    | (a) Indicate the study design (interrupted time series) in the title or abstract                                 | Title and abstract                                                                             |
| <b>Introduction</b>          |      |                                                                                                                  |                                                                                                |
| Background/<br>rationale     | 2    | Provide background regarding the intervention and setting under investigation to the study rationale and methods | Introduction, paragraphs 1-3                                                                   |
| Objectives                   | 3    | (a) State specific objectives and any prespecified hypotheses                                                    | Introduction, paragraph 4                                                                      |
|                              |      | (b) Distinguish between primary and secondary objectives                                                         | Methods, paragraph 2                                                                           |
| <b>Methods</b>               |      |                                                                                                                  |                                                                                                |
| Intervention                 | 4    | Define the intervention time point(s) used in the analysis                                                       | Methods: Intervention design, Statistical analysis                                             |
| Participants                 | 5    | (a) List eligibility criteria and methods of selection                                                           | Methods: Case detection intervention                                                           |
|                              |      | (b) Define subgroups                                                                                             | Methods: Case detection intervention                                                           |
|                              |      | (c) Consider including a comparison group not exposed to the intervention as a secondary group of participants   | Methods: Intervention and control areas                                                        |
| Data sources/<br>measurement | 6    | (a) List data source(s)                                                                                          | Methods: Data sources                                                                          |
|                              |      | (b) Comment on data completeness, validity, and changes in data coverage over time                               | Methods: Data Sources<br>Results: Population-level case detection                              |
| Variables                    | 7    | (a) Define all variables                                                                                         |                                                                                                |
|                              |      | • Outcome variable(s)                                                                                            | Methods: Intervention design<br>Methods: Statistical analysis, Population-level case detection |
|                              |      | • Descriptive and stratifying variable(s)                                                                        | Methods: Statistical analysis, Intervention-level case detection                               |
|                              |      | (b) Comment on change in variable coding over time                                                               |                                                                                                |
|                              |      | (c) Consider including details of variable coding in supplemental material                                       | S1 Text                                                                                        |
| Statistical methods          | 8    | (a) Report all statistical methods                                                                               | Methods: Statistical analysis                                                                  |
|                              |      | • Study time intervals, for example, monthly, quarterly                                                          | Methods: Statistical analysis, Population-level case detection                                 |
|                              |      | • Regression model, for example, ARIMA, linear, segmented                                                        | Methods: Statistical analysis, Population-level case detection                                 |
|                              |      | ◦ For ARIMA models, include the intervention                                                                     |                                                                                                |
|                              |      | ◦ Indicate the appropriateness of linear model(s) when applied                                                   |                                                                                                |
|                              |      | Number of preintervention, postintervention and between intervention data points                                 | Methods: Statistical analysis, Population-level case detection, paragraph 2                    |

| Item              | Item | Recommendation                                                                                                          | Location                                                                           |
|-------------------|------|-------------------------------------------------------------------------------------------------------------------------|------------------------------------------------------------------------------------|
|                   |      | (b) Define the study period and number of preintervention data points used in forecasting                               | Methods: Statistical analysis, Population-level case detection, paragraph 2        |
|                   |      | (c) Indicate how autocorrelation, nonstationarity, and seasonality were tested and handled                              | Methods: Statistical analysis, Population-level case detection, paragraph 4        |
|                   |      | (d) Consider a lag period if intervention effects are gradual or delayed                                                |                                                                                    |
|                   |      | (e) Define and distinguish between primary and secondary or sensitivity analyses                                        | Methods: Statistical analysis, Population-level case detection, paragraphs 2 and 3 |
|                   |      | (f) Consider use of comparison outcome(s) and/or population(s) not exposed to the intervention(s) as secondary analyses | Methods: Intervention and control areas                                            |
|                   |      | (g) Report statistical software used for analysis                                                                       | Methods: Statistical analysis, Population-level case detection, paragraph 4        |
| <b>Results</b>    |      |                                                                                                                         |                                                                                    |
| Participants      | 9    | (a) Report numbers of individuals and/or observations in each group analyzed                                            | Table 1<br>Results: intervention-level case detection                              |
|                   |      | (b) Consider use of a flow diagram                                                                                      | Table 1                                                                            |
|                   |      | (c) Describe characteristics and missing data                                                                           | Results: Population-level case detection                                           |
| Outcome data      | 10   | (a) Report the number of outcomes examined over the study period                                                        | Results: Population-level case detection                                           |
|                   |      | (b) Report the average, minimum, and maximum number of outcomes across time intervals                                   | Results: Population-level case detection                                           |
|                   |      | (c) Report on data variability                                                                                          | Results: Population-level case detection                                           |
|                   |      | (d) Comment on outliers and ceiling or floor effects where relevant                                                     | Results: Population-level case detection                                           |
| Main results      | 11   | (a) Present results using a graphical display with intervention time point(s) clearly defined                           | Figure 3                                                                           |
|                   |      | (b) Consider including forecasted results graphically                                                                   | Figure 3                                                                           |
|                   |      | (c) Report absolute and/or relative change(s) and their significance, for example, clinical or policy and statistical   | Table 4<br>Results: Population-level case detection                                |
| Other analyses    | 12   | Report additional results (secondary and sensitivity analyses) in the article, appendix or research Web site            | Supporting information                                                             |
| <b>Discussion</b> |      |                                                                                                                         |                                                                                    |
| Key results       | 13   | Summarise key results with reference to study objectives                                                                | Discussion, paragraph 1                                                            |
| Context           | 14   | (a) Provide context related to possible confounding                                                                     | Discussion, paragraph 4                                                            |

| Item                     | Item | Recommendation                                                                                                                           | Location                              |
|--------------------------|------|------------------------------------------------------------------------------------------------------------------------------------------|---------------------------------------|
|                          |      | • Discuss relevant cointerventions that occurred during the study period                                                                 | Discussion, paragraph 4               |
|                          |      | • Comment on the stability of participant characteristics over time                                                                      | Discussion, paragraphs 4 and 5        |
|                          |      | • Comment on the stability of outcome coding over time                                                                                   | Discussion: Strengths and limitations |
|                          |      | (b) Discuss results of comparison analyses or provide a rationale if no comparison group was considered                                  | Discussion, paragraph 4               |
| Limitations              | 15   | (a) Discuss limitations of study                                                                                                         | Discussion: Strengths and limitations |
|                          |      | (b) Comment on data variability and appropriateness of the number of data points                                                         | Discussion: Strengths and limitations |
|                          |      | (c) Comment on ceiling or floor effects and outliers where relevant                                                                      | Discussion: Strengths and limitations |
|                          |      | (d) Discuss direction and magnitude of any potential bias                                                                                | Discussion: Strengths and limitations |
| Interpretation           | 16   | Provide overall interpretation of results considering objectives, limitations, results from similar studies, and other relevant evidence | Discussion and conclusion             |
| <b>Other information</b> |      |                                                                                                                                          |                                       |
| Funding                  | 17   | List of funding source(s) and role of funders                                                                                            | Funding section                       |
| References               | 18   | Reference methodological articles that support statistical methods used                                                                  | References 20-26                      |
