# Supplementary material for: Impact of intensified tuberculosis case finding at health facilities on case notifications in Cameroon: A controlled interrupted time series analysis
Source: PubMed Central journal article supplement (PMC10021155; doi:10.1371/journal.pgph.0000301), 2022-07-19
Supplement: pgph.0000301.s002.pdf [file pgph.0000301.s002.pdf]

**S1 Table. Additionality analysis based on trend-expected values for previous 3 years for all-forms and bacteriologically-confirmed TB case notifications in the intervention area (6 regions), control area (4 regions) and nationally (all 10 regions)**

| TB case notifications compared to 3-year trend-expected notifications | Trend-expected notifications (2019) <sup>a</sup> | Notifications during the first year of the intervention (2019) <sup>b</sup> |                | Trend-expected notifications (2020) <sup>a</sup> | Notifications during the first year of the intervention (2020) <sup>b</sup> |                | Trend-expected notifications (2019-2020) | Total notifications during the two years of the intervention (2019-2020) <sup>b</sup> |                |
|-----------------------------------------------------------------------|--------------------------------------------------|-----------------------------------------------------------------------------|----------------|--------------------------------------------------|-----------------------------------------------------------------------------|----------------|------------------------------------------|---------------------------------------------------------------------------------------|----------------|
|                                                                       |                                                  | Number                                                                      | Additional (%) |                                                  | Number                                                                      | Additional (%) |                                          | Number                                                                                | Additional (%) |
| <b>All-forms</b>                                                      |                                                  |                                                                             |                |                                                  |                                                                             |                |                                          |                                                                                       |                |
| Intervention area (6 regions)                                         | 13,028                                           | 14,576                                                                      | 1,548 (11.9%)  | 12,240                                           | 13,537                                                                      | 1,297 (10.6%)  | 25,268                                   | 28,113                                                                                | 2,845 (11.3%)  |
| Control area (4 regions)                                              | 9,599                                            | 10,006                                                                      | 407 (4.2%)     | 8,892                                            | 8,887                                                                       | -5 (-0.1%)     | 18,491                                   | 18,893                                                                                | 402 (2.2%)     |
| National (10 regions)                                                 | 22,627                                           | 24,582                                                                      | 1,955 (8.6%)   | 21,132                                           | 22,424                                                                      | 1,292 (6.1%)   | 43,759                                   | 47,006                                                                                | 3,247 (7.4%)   |
| <b>Bacteriologically-confirmed</b>                                    |                                                  |                                                                             |                |                                                  |                                                                             |                |                                          |                                                                                       |                |
| Intervention area (6 regions)                                         | 8,065                                            | 9,410                                                                       | 1,345 (16.7%)  | 7,651                                            | 9,056                                                                       | 1,405 (18.4%)  | 15,716                                   | 18,466                                                                                | 2,750 (17.5%)  |
| Control area (4 regions)                                              | 5,353                                            | 6,071                                                                       | 718 (13.4%)    | 5,067                                            | 5,471                                                                       | 404 (8%)       | 10,420                                   | 11,542                                                                                | 1,122 (10.8%)  |
| National area (10 regions)                                            | 13,418                                           | 15,481                                                                      | 2,063 (15.4%)  | 12,718                                           | 14,527                                                                      | 1,809 (14.2%)  | 26,136                                   | 30,008                                                                                | 3,872 (14.8%)  |

<sup>a</sup>Based on extrapolation of linear trend from Q1 2016 to Q4 2018

<sup>b</sup>Quarterly all-forms TB notifications shown in Table 2; quarterly bacteriologically-confirmed TB notifications shown in S3 Table.
