# Supplementary material for: Impact of intensified tuberculosis case finding at health facilities on case notifications in Cameroon: A controlled interrupted time series analysis
Source: PubMed Central journal article supplement (PMC10021155; doi:10.1371/journal.pgph.0000301), 2022-07-19
Supplement: pgph.0000301.s003.pdf [file pgph.0000301.s003.pdf]

**S2 Table. Additionality analysis as compared to one-year prior to intervention for all-forms and bacteriologically-confirmed TB case notifications in the intervention area (6 regions), control area (4 regions) and nationally (all 10 regions)**

| TB case notifications compared to previous year notifications | Baseline notifications (2018) | Notifications during the first year of the intervention (2019) <sup>a</sup> |                | Baseline notifications (2018) | Notifications during the second year of the intervention (2020) <sup>a</sup> |                | Baseline notifications (2018 x 2) | Total notifications during the two years of the intervention (2019-2020) <sup>a</sup> |                |
|---------------------------------------------------------------|-------------------------------|-----------------------------------------------------------------------------|----------------|-------------------------------|------------------------------------------------------------------------------|----------------|-----------------------------------|---------------------------------------------------------------------------------------|----------------|
|                                                               |                               |                                                                             | Additional (%) |                               |                                                                              | Additional (%) |                                   |                                                                                       | Additional (%) |
| <b>All forms</b>                                              |                               |                                                                             |                |                               |                                                                              |                |                                   |                                                                                       |                |
| Intervention area (6 regions)                                 | 13,898                        | 14,576                                                                      | 678 (4.9%)     | 13,898                        | 13,537                                                                       | -361 (-2.6%)   | 27,796                            | 28,113                                                                                | 317 (1.1%)     |
| Control area (4 regions)                                      | 9,859                         | 10,006                                                                      | 147 (1.5%)     | 9,859                         | 8,887                                                                        | -972 (-9.9%)   | 19,718                            | 18,893                                                                                | -825 (-4.2%)   |
| National (10 regions)                                         | 23,757                        | 24,582                                                                      | 825 (3.5%)     | 23,757                        | 22,424                                                                       | -1,333 (-5.6%) | 47,514                            | 47,006                                                                                | -508 (-1.1%)   |
| <b>Bacteriologically-confirmed</b>                            |                               |                                                                             |                |                               |                                                                              |                |                                   |                                                                                       |                |
| Intervention area (6 regions)                                 | 8,634                         | 9,410                                                                       | 776 (9%)       | 8,634                         | 9,056                                                                        | 422 (4.9%)     | 17,268                            | 18,466                                                                                | 1,198 (6.9%)   |
| Control area (4 regions)                                      | 5,707                         | 6,071                                                                       | 364 (6.4%)     | 5,798                         | 5,471                                                                        | -327 (-5.6%)   | 11,505                            | 11,542                                                                                | 37 (0.3%)      |
| National (10 regions)                                         | 14,341                        | 15,481                                                                      | 1,140 (7.9%)   | 14,432                        | 14,527                                                                       | 95 (0.7%)      | 28,773                            | 30,008                                                                                | 1,235 (4.3%)   |

<sup>a</sup>Quarterly all-forms TB notifications shown in Table 2; quarterly bacteriologically-confirmed TB notifications shown in S3 Table.
