# Supplementary material for: Impact of intensified tuberculosis case finding at health facilities on case notifications in Cameroon: A controlled interrupted time series analysis
Source: PubMed Central journal article supplement (PMC10021155; doi:10.1371/journal.pgph.0000301), 2022-07-19
Supplement: pgph.0000301.s004.pdf [file pgph.0000301.s004.pdf]

**S3 Table.** Quarterly bacteriologically-confirmed TB case notifications and case notification rates from Q1 2016 to Q4 2020, for the intervention area (6 regions) and control area (4 regions)

| 2016 |    |    |    | 2017 |    |    |    | 2018 |    |    |    | 2019 |    |    |    | 2020 |    |    |    |
|------|----|----|----|------|----|----|----|------|----|----|----|------|----|----|----|------|----|----|----|
| Q1   | Q2 | Q3 | Q4 | Q1   | Q2 | Q3 | Q4 | Q1   | Q2 | Q3 | Q4 | Q1   | Q2 | Q3 | Q4 | Q1   | Q2 | Q3 | Q4 |

**Notifications (people with bacteriologically-confirmed TB)**

|              |       |       |       |       |       |       |       |       |       |       |       |       |       |       |       |       |       |       |       |       |
|--------------|-------|-------|-------|-------|-------|-------|-------|-------|-------|-------|-------|-------|-------|-------|-------|-------|-------|-------|-------|-------|
| Intervention | 2,562 | 2,388 | 2,322 | 2,332 | 2,397 | 2,130 | 2,112 | 2,239 | 2,325 | 2,188 | 2,107 | 2,229 | 2,365 | 2,366 | 2,548 | 2,397 | 2,751 | 2,059 | 2,219 | 2,318 |
| Control      | 1,671 | 1,557 | 1,632 | 1,599 | 1,569 | 1,478 | 1,395 | 1,531 | 1,548 | 1,398 | 1,432 | 1,468 | 1,598 | 1,469 | 1,572 | 1,586 | 1,570 | 1,384 | 1,293 | 1,369 |

**Notification rate (bacteriologically-confirmed TB cases per 100,000 people)\***

|              |      |      |      |      |      |      |      |      |      |      |      |      |      |      |      |      |      |      |      |      |
|--------------|------|------|------|------|------|------|------|------|------|------|------|------|------|------|------|------|------|------|------|------|
| Intervention | 16.1 | 15.0 | 14.6 | 14.6 | 15.0 | 13.3 | 13.2 | 14.0 | 14.6 | 13.7 | 13.2 | 14.0 | 14.8 | 14.8 | 16.0 | 15.0 | 17.2 | 12.9 | 13.9 | 14.5 |
| Control      | 22.9 | 21.3 | 22.4 | 21.9 | 21.5 | 20.3 | 19.1 | 21.0 | 21.2 | 19.2 | 19.6 | 20.1 | 21.9 | 20.1 | 21.6 | 21.7 | 21.5 | 19.0 | 17.7 | 18.8 |

\*Case notification rates were calculated using the intervention area population (approx. 16m people) and control area population (approx. 7.3m people)
