# Supplementary material for: Impact of intensified tuberculosis case finding at health facilities on case notifications in Cameroon: A controlled interrupted time series analysis
Source: PubMed Central journal article supplement (PMC10021155; doi:10.1371/journal.pgph.0000301), 2022-07-19
Supplement: pgph.0000301.s005.pdf [file pgph.0000301.s005.pdf]

## S1 Text. Description of regression model and model parameters used for Tables 2 and 3

The regression model for the analyses has the form:[1,2]

$$\log(Y_t) = \beta_0 + \beta_1 T_t + \beta_2 X_t + \beta_3 X_t T_t + \beta_4 Z + \beta_5 Z T_t + \beta_6 Z X_t + \beta_7 Z X_t T_t + \log(P) + \varepsilon_t$$

|                 |                                                                        |
|-----------------|------------------------------------------------------------------------|
| $Y$             | case notification rate per quarter at quarter $t$ ( $t=1, \dots, 20$ ) |
| $T$             | number of quarters since the start of analysis; $1, \dots, 20$         |
| $X_t$           | 0 if $t$ prior to intervention, 1 if $t$ during intervention           |
| $Z$             | Control area (4 regions)= 0; Intervention area (6 regions)= 1          |
| $P$             | Total population in the cohort                                         |
| $\varepsilon_t$ | Variability at time $t$ ( $t=1, \dots, 20$ )                           |

$ZT_t$ ,  $X_t T_t$  and  $ZX_t T_t$  are interaction terms where  $T$  restarts at 0 at the start of the intervention (Q1 2019).

The exponentiated regression coefficients ( $\beta_0$  to  $\beta_7$ ) represent case notification rate ratios (RR) for every unit increase in time (quarters). The coefficients  $\beta_0$  to  $\beta_3$  represent the control group:  $\beta_0$ , intercept or starting level;  $\beta_1$ , pre-intervention trend in the control group;  $\beta_2$ , intervention level change in control group in first quarter of intervention;  $\beta_3$ , trend in control group during intervention.  $\beta_4$  to  $\beta_7$  represent differences between the control and intervention groups, where  $\beta_4$ , difference in baseline intercepts between the intervention and control groups,  $\beta_5$ , difference in pre-intervention trends between intervention and control groups;  $\beta_6$ , difference in intervention level change at first quarter of intervention between intervention and control groups;  $\beta_7$ , difference in the trend between intervention and control groups during the intervention.

### References:

1. Linden, A. A comprehensive set of postestimation measures to enrich interrupted time-series analysis. *Stata J.* **2017**, 73–88, doi:10.1177/1536867X1701700105.
2. Linden, A. Conducting interrupted time-series analysis for single- and multiple-group comparisons. *Stata J.* **2015**, 15, 480–500, doi:10.1177/1536867X1501500208.

**Table A.** Detailed description of model parameters used for Tables 2 and 3, following Linden.[1,2]

**Table 2 model parameters**

| <b>Trend in quarterly case notification rates, pre-intervention</b>                            |                                         |
|------------------------------------------------------------------------------------------------|-----------------------------------------|
| Control population                                                                             | $\beta_1$                               |
| Intervention population                                                                        | $\beta_1 + \beta_5$                     |
| Difference, intervention vs control                                                            | $\beta_5$                               |
| <b>Level change, intervention vs pre-intervention</b>                                          |                                         |
| Control population                                                                             | $\beta_2$                               |
| Intervention population                                                                        | $\beta_2 + \beta_6$                     |
| Difference, intervention vs control                                                            | $\beta_6$                               |
| <b>Trend in quarterly case notification rates, during intervention</b>                         |                                         |
| Control population                                                                             | $\beta_1 + \beta_3$                     |
| Intervention population                                                                        | $\beta_1 + \beta_3 + \beta_5 + \beta_7$ |
| Difference, intervention vs control                                                            | $\beta_5 + \beta_7$                     |
| <b>Trend difference in quarterly case notification rates, intervention vs pre-intervention</b> |                                         |
| Control population                                                                             | $\beta_3$                               |
| Intervention population                                                                        | $\beta_3 + \beta_7$                     |
| Difference, intervention vs control                                                            | $\beta_7$                               |

**Table 3 model parameters**

| <b>Observed: Case notification rate, modelled based on observed data</b>                 |                                                                                                         |
|------------------------------------------------------------------------------------------|---------------------------------------------------------------------------------------------------------|
| Control population                                                                       | $\beta_0 + \beta_1 T_t + \beta_2 + \beta_3 X_t T_t$                                                     |
| Intervention population                                                                  | $\beta_0 + \beta_1 T_t + \beta_2 + \beta_3 X_t T_t + \beta_4 + \beta_5 T_t + \beta_6 + \beta_7 X_t T_t$ |
| <b>Counterfactual: case notification rate, modelled based on pre-intervention trends</b> |                                                                                                         |
| Control population                                                                       | $\beta_0 + \beta_1 T_t$                                                                                 |
| Intervention population                                                                  | $\beta_0 + \beta_1 T_t + \beta_4 + \beta_5 T_t$                                                         |
| <b>Case notification rate ratios</b>                                                     |                                                                                                         |
| Control population, observed vs. counterfactual                                          | $\beta_2 + \beta_3 X_t T_t$                                                                             |
| Intervention population, observed vs. counterfactual                                     | $\beta_2 + \beta_3 X_t T_t + \beta_6 + \beta_7 X_t T_t$                                                 |
| Difference, intervention vs control populations                                          | $\beta_6 + \beta_7 X_t T_t$                                                                             |

References:

1. Linden, A. A comprehensive set of postestimation measures to enrich interrupted time-series analysis. *Stata J.* **2017**, 73–88, doi:10.1177/1536867X1701700105.
2. Linden, A. Conducting interrupted time-series analysis for single- and multiple-group comparisons. *Stata J.* **2015**, 15, 480–500, doi:10.1177/1536867X1501500208.
