# Supplementary material for: Impact of intensified tuberculosis case finding at health facilities on case notifications in Cameroon: A controlled interrupted time series analysis
Source: PubMed Central journal article supplement (PMC10021155; doi:10.1371/journal.pgph.0000301), 2022-07-19
Supplement: pgph.0000301.s006.pdf [file pgph.0000301.s006.pdf]

**S2 Text.** Controlled interrupted time series analyses of bacteriologically-confirmed TB case notification rates for intervention and control populations; from Q1 2016 to Q4 2020

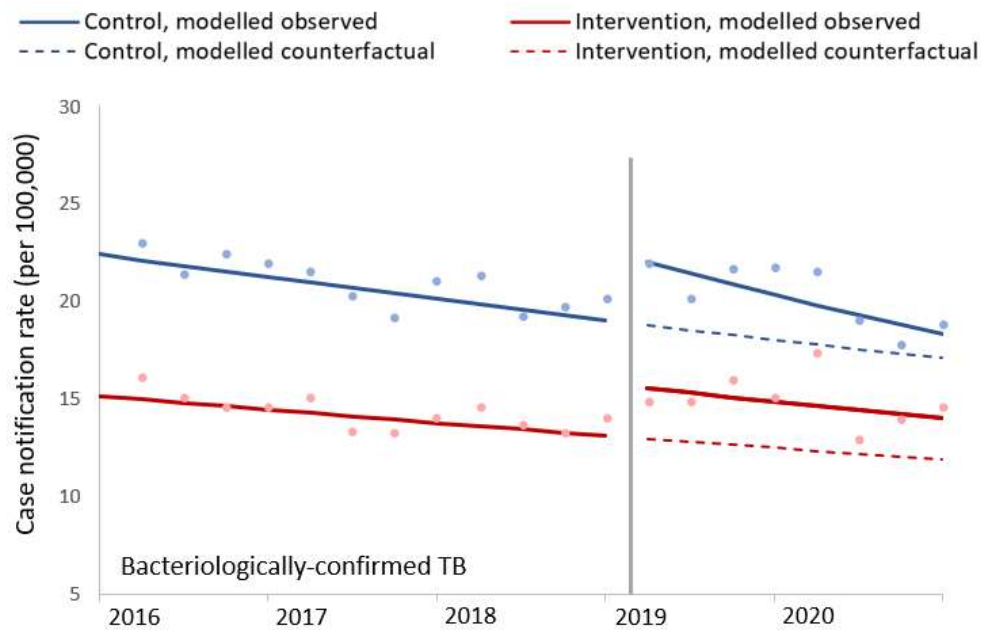

**Figure A. Controlled interrupted time series analysis model graphs of population-standardized quarterly notification rates of bacteriologically-confirmed TB for intervention and control populations; from Q1 2016 to Q4 2020, with intervention start in Q1 2019.** The observed data points are shown with dots, and the lines are modelled data, with solid lines for modelled observed data and dashed lines for the counterfactual models based on pre-intervention trends; the vertical line indicates the start of the intervention.

**Table A.** Trend and level changes in quarterly case notification rate ratios for bacteriologically-confirmed TB before and during the intervention, in control and intervention populations

| <b>Bacteriologically-confirmed TB</b>                                                          |                                             |               |                |
|------------------------------------------------------------------------------------------------|---------------------------------------------|---------------|----------------|
|                                                                                                | <b>Case<br/>notification<br/>rate ratio</b> | <b>95% CI</b> | <b>P-value</b> |
| <b>Trend in quarterly case notification rates, pre-intervention (Q1 2016 to Q4 2018)</b>       |                                             |               |                |
| Control population                                                                             | 0.987                                       | (0.984-0.989) | <0.001         |
| Intervention population                                                                        | 0.988                                       | (0.986-0.99)  | <0.001         |
| Difference, intervention vs control                                                            | 1.002                                       | (0.998-1.005) | 0.40           |
| <b>Level change, intervention vs pre-intervention (Q1 2019)</b>                                |                                             |               |                |
| Control population                                                                             | 1.171                                       | (1.135-1.209) | <0.001         |
| Intervention population                                                                        | 1.199                                       | (1.169-1.23)  | <0.001         |
| Difference, intervention vs control                                                            | 1.024                                       | (0.983-1.066) | 0.29           |
| <b>Trend in quarterly case notification rates, during intervention (Q1 2019 to Q4 2020)</b>    |                                             |               |                |
| Control population                                                                             | 0.974                                       | (0.969-0.979) | <0.001         |
| Intervention population                                                                        | 0.986                                       | (0.981-0.99)  | <0.001         |
| Difference, intervention vs control                                                            | 1.012                                       | (1.005-1.019) | 0.001          |
| <b>Trend difference in quarterly case notification rates, intervention vs pre-intervention</b> |                                             |               |                |
| Control population                                                                             | 0.987                                       | (0.982-0.993) | <0.001         |
| Intervention population                                                                        | 0.998                                       | (0.993-1.002) | 0.32           |
| Difference, intervention vs control                                                            | 1.010                                       | (1.003-1.018) | 0.006          |

**Table B.** Modelled case notification rates (CNRs) and case notifications rate ratios for bacteriologically-confirmed TB, for the intervention and control areas; after 8 quarters of the intervention (at Q4 2020)

|                                                                                                     | Bacteriologically-confirmed TB |               | P-value |
|-----------------------------------------------------------------------------------------------------|--------------------------------|---------------|---------|
|                                                                                                     | 95% CI                         |               |         |
| <b>Observed: Case notification rate in Q4 2020, modelled based on observed data</b>                 |                                |               |         |
| Control population                                                                                  | 18.32                          | (17.9-18.75)  |         |
| Intervention population                                                                             | 14.05                          | (13.8-14.31)  |         |
| <b>Counterfactual: case notification rate in Q4 2020, modelled based on pre-intervention trends</b> |                                |               |         |
| Control population                                                                                  | 17.10                          | (16.41-17.81) |         |
| Intervention population                                                                             | 11.92                          | (11.53-12.32) |         |
| <b>Case notification rate ratios, Q4 2020</b>                                                       |                                |               |         |
| Control population, observed vs. counterfactual                                                     | 1.07                           | (1.03-1.12)   | 0.002   |
| Intervention population, observed vs. counterfactual                                                | 1.18                           | (1.14-1.22)   | <0.001  |
| Ratio of case notification rate ratios, intervention vs control populations                         | 1.10                           | (1.04-1.16)   | 0.001   |
